# Supplementary material for: SARS-CoV-2 Genomic Characteristics and Clinical Impact of SARS-CoV-2 Viral Diversity in Critically Ill COVID-19 Patients: A Prospective Multicenter Cohort Study
Source: MDPI journal article supplement (doi:10.3390/v14071529), 2022-07-13

# **SARS CoV-2 genomic characteristics and clinical impact of SARS-CoV-2 viral diversity in critically ill COVID-19 patients: a prospective multicenter cohort study**

## ***Supplementary file***

### **Content**

|                                                  |           |
|--------------------------------------------------|-----------|
| <b>GISAID IDs of the sequenced samples .....</b> | <b>2</b>  |
| <b>Supplementary Table S1 .....</b>              | <b>11</b> |
| <b>Supplementary Figure S1 .....</b>             | <b>12</b> |

## Methods

GISAI D Ids of the sequenced samples:

hCoV-19/France/IDF-HMN-20102050656/2020  
hCoV-19/France/IDF-HMN-20102090001/2020  
hCoV-19/France/IDF-HMN-20102110042/2020  
hCoV-19/France/IDF-HMN-20102140706/2020  
hCoV-19/France/IDF-HMN-20102270667/2020  
hCoV-19/France/IDF-HMN-20102280010/2020  
hCoV-19/France/IDF-HMN-20102290035/2020  
hCoV-19/France/IDF-HMN-20112020220/2020  
hCoV-19/France/IDF-HMN-20112020241/2020  
hCoV-19/France/IDF-HMN-20112030383/2020  
hCoV-19/France/IDF-HMN-20112040489/2020  
hCoV-19/France/IDF-HMN-20112080121/2020  
hCoV-19/France/IDF-HMN-20112190152/2020  
hCoV-19/France/IDF-HMN-20122020179/2020  
hCoV-19/France/IDF-HMN-20122070325/2020  
hCoV-19/France/IDF-HMN-20122220067/2020  
hCoV-19/France/IDF-HMN-20122260179/2020  
hCoV-19/France/IDF-HMN-20122270023/2020  
hCoV-19/France/IDF-HMN-21012150227/2021  
hCoV-19/France/IDF-HMN-21012220001/2021  
hCoV-19/France/IDF-HMN-21012250076/2021  
hCoV-19/France/IDF-HMN-21012250077/2021  
hCoV-19/France/IDF-HMN-21012250090/2021  
hCoV-19/France/IDF-HMN-21012250091/2021  
hCoV-19/France/IDF-HMN-21012250415/2021  
hCoV-19/France/IDF-HMN-21012250669/2021  
hCoV-19/France/IDF-HMN-21012300202/2021  
hCoV-19/France/IDF-HMN-21012310106/2021  
hCoV-19/France/IDF-HMN-21022030255/2021  
hCoV-19/France/IDF-HMN-21022030571/2021  
hCoV-19/France/IDF-HMN-21022050238/2021  
hCoV-19/France/IDF-HMN-21022050483/2021  
hCoV-19/France/IDF-HMN-21022050487/2021  
hCoV-19/France/IDF-HMN-21022070154/2021  
hCoV-19/France/IDF-HMN-21022080597/2021  
hCoV-19/France/IDF-HMN-21022110269/2021  
hCoV-19/France/IDF-HMN-21022130003/2021  
hCoV-19/France/IDF-HMN-21022140003/2021  
hCoV-19/France/IDF-HMN-21022140013/2021  
hCoV-19/France/IDF-HMN-21022150691/2021  
hCoV-19/France/IDF-HMN-21022170518/2021  
hCoV-19/France/IDF-HMN-21022190564/2021

hCoV-19/France/IDF-HMN-21022200049/2021  
hCoV-19/France/IDF-HMN-21022200182/2021  
hCoV-19/France/IDF-HMN-21022210144/2021  
hCoV-19/France/IDF-HMN-21022220043/2021  
hCoV-19/France/IDF-HMN-21022220432/2021  
hCoV-19/France/IDF-HMN-21022240393/2021  
hCoV-19/France/IDF-HMN-21022240416/2021  
hCoV-19/France/IDF-HMN-21022250001/2021  
hCoV-19/France/IDF-HMN-21022250340/2021  
hCoV-19/France/IDF-HMN-21022260319/2021  
hCoV-19/France/IDF-HMN-21022270139/2021  
hCoV-19/France/IDF-HMN-21022280188/2021  
hCoV-19/France/IDF-HMN-21032010082/2021  
hCoV-19/France/IDF-HMN-21032030609/2021  
hCoV-19/France/IDF-HMN-21032040013/2021  
hCoV-19/France/IDF-HMN-21032040454/2021  
hCoV-19/France/IDF-HMN-21032040568/2021  
hCoV-19/France/IDF-HMN-21032050170/2021  
hCoV-19/France/IDF-HMN-21032060201/2021  
hCoV-19/France/IDF-HMN-21032070125/2021  
hCoV-19/France/IDF-HMN-21032080012/2021  
hCoV-19/France/IDF-HMN-21032080679/2021  
hCoV-19/France/IDF-HMN-21032081018/2021  
hCoV-19/France/IDF-HMN-21032081084/2021  
hCoV-19/France/IDF-HMN-21032090136/2021  
hCoV-19/France/IDF-HMN-21032100025/2021  
hCoV-19/France/IDF-HMN-21032110070/2021  
hCoV-19/France/IDF-HMN-21032120565/2021  
hCoV-19/France/IDF-HMN-21032120576/2021  
hCoV-19/France/IDF-HMN-21032130134/2021  
hCoV-19/France/IDF-HMN-21032160775/2021  
hCoV-19/France/IDF-HMN-21032170105/2021  
hCoV-19/France/IDF-HMN-21032200123/2021  
hCoV-19/France/IDF-HMN-21032200204/2021  
hCoV-19/France/IDF-HMN-21032200216/2021  
hCoV-19/France/IDF-HMN-21032220978/2021  
hCoV-19/France/IDF-HMN-21032230172/2021  
hCoV-19/France/IDF-HMN-21032230174/2021  
hCoV-19/France/IDF-HMN-21032230472/2021  
hCoV-19/France/IDF-HMN-21032230511/2021  
hCoV-19/France/IDF-HMN-21032231024/2021  
hCoV-19/France/IDF-HMN-21032240621/2021  
hCoV-19/France/IDF-HMN-21032270009/2021  
hCoV-19/France/IDF-HMN-21032270182/2021  
hCoV-19/France/IDF-HMN-21032290469/2021  
hCoV-19/France/IDF-HMN-21032290617/2021

hCoV-19/France/IDF-HMN-21032300836/2021  
hCoV-19/France/IDF-HMN-21042020139/2021  
hCoV-19/France/IDF-HMN-21042040020/2021  
hCoV-19/France/IDF-HMN-21042040101/2021  
hCoV-19/France/IDF-HMN-21042050182/2021  
hCoV-19/France/IDF-HMN-21042060234/2021  
hCoV-19/France/IDF-HMN-21042061127/2021  
hCoV-19/France/IDF-HMN-21042080135/2021  
hCoV-19/France/IDF-HMN-21042090449/2021  
hCoV-19/France/IDF-HMN-21042090934/2021  
hCoV-19/France/IDF-HMN-21042110158/2021  
hCoV-19/France/IDF-HMN-21042110182/2021  
hCoV-19/France/IDF-HMN-21042120870/2021  
hCoV-19/France/IDF-HMN-21042140013/2021  
hCoV-19/France/IDF-HMN-21042160297/2021  
hCoV-19/France/IDF-HMN-21042160892/2021  
hCoV-19/France/IDF-HMN-21042180155/2021  
hCoV-19/France/IDF-HMN-21042210512/2021  
hCoV-19/France/IDF-HMN-21042210560/2021  
hCoV-19/France/IDF-HMN-21042210599/2021  
hCoV-19/France/IDF-HMN-21042220507/2021  
hCoV-19/France/IDF-HMN-21042280540/2021  
hCoV-19/France/IDF-HMN-21042280543/2021  
hCoV-19/France/IDF-HMN-21052040088/2021  
hCoV-19/France/IDF-HMN-21052070581/2021  
hCoV-19/France/IDF-HMN-21052140053/2021  
hCoV-19/France/IDF-HMN-21052140055/2021  
hCoV-19/France/IDF-HMN-21052140567/2021  
hCoV-19/France/IDF-HMN-21052150032/2021  
hCoV-19/France/IDF-HMN-21052160070/2021  
hCoV-19/France/IDF-HMN-21052170806/2021  
hCoV-19/France/IDF-HMN-21052190275/2021  
hCoV-19/France/IDF-HMN-21052190280/2021  
hCoV-19/France/IDF-HMN-21052190283/2021  
hCoV-19/France/IDF-HMN-21052190284/2021  
hCoV-19/France/IDF-HMN-21052190286/2021  
hCoV-19/France/IDF-HMN-21052190287/2021  
hCoV-19/France/IDF-HMN-21052190288/2021  
hCoV-19/France/IDF-HMN-21052190289/2021  
hCoV-19/France/IDF-HMN-21052190290/2021  
hCoV-19/France/IDF-HMN-21052190293/2021  
hCoV-19/France/IDF-HMN-21052190295/2021  
hCoV-19/France/IDF-HMN-21052190298/2021  
hCoV-19/France/IDF-HMN-21052190301/2021  
hCoV-19/France/IDF-HMN-21052190305/2021  
hCoV-19/France/IDF-HMN-21052190309/2021

hCoV-19/France/IDF-HMN-21052190312/2021  
hCoV-19/France/IDF-HMN-21052190313/2021  
hCoV-19/France/IDF-HMN-21052190314/2021  
hCoV-19/France/IDF-HMN-21052190316/2021  
hCoV-19/France/IDF-HMN-21052190317/2021  
hCoV-19/France/IDF-HMN-21052190318/2021  
hCoV-19/France/IDF-HMN-21052190319/2021  
hCoV-19/France/IDF-HMN-21052190320/2021  
hCoV-19/France/IDF-HMN-21052190322/2021  
hCoV-19/France/IDF-HMN-21052190324/2021  
hCoV-19/France/IDF-HMN-21052190326/2021  
hCoV-19/France/IDF-HMN-21052190347/2021  
hCoV-19/France/IDF-HMN-21052190349/2021  
hCoV-19/France/IDF-HMN-21052190350/2021  
hCoV-19/France/IDF-HMN-21052190351/2021  
hCoV-19/France/IDF-HMN-21052190352/2021  
hCoV-19/France/IDF-HMN-21052190353/2021  
hCoV-19/France/IDF-HMN-21052190418/2021  
hCoV-19/France/IDF-HMN-21052190419/2021  
hCoV-19/France/IDF-HMN-21052190421/2021  
hCoV-19/France/IDF-HMN-21052190423/2021  
hCoV-19/France/IDF-HMN-21052190426/2021  
hCoV-19/France/IDF-HMN-21052190430/2021  
hCoV-19/France/IDF-HMN-21052190442/2021  
hCoV-19/France/IDF-HMN-21052190445/2021  
hCoV-19/France/IDF-HMN-21052190462/2021  
hCoV-19/France/IDF-HMN-21052190463/2021  
hCoV-19/France/IDF-HMN-21052190466/2021  
hCoV-19/France/IDF-HMN-21052190469/2021  
hCoV-19/France/IDF-HMN-21052190472/2021  
hCoV-19/France/IDF-HMN-21052190474/2021  
hCoV-19/France/IDF-HMN-21052190480/2021  
hCoV-19/France/IDF-HMN-21052190482/2021  
hCoV-19/France/IDF-HMN-21052190485/2021  
hCoV-19/France/IDF-HMN-21052190488/2021  
hCoV-19/France/IDF-HMN-21052230088/2021  
hCoV-19/France/IDF-HMN-21052270599/2021  
hCoV-19/France/IDF-HMN-21052270601/2021  
hCoV-19/France/IDF-HMN-21052270603/2021  
hCoV-19/France/IDF-HMN-21052270604/2021  
hCoV-19/France/IDF-HMN-21052270605/2021  
hCoV-19/France/IDF-HMN-21052270607/2021  
hCoV-19/France/IDF-HMN-21052270608/2021  
hCoV-19/France/IDF-HMN-21052270610/2021  
hCoV-19/France/IDF-HMN-21052270618/2021  
hCoV-19/France/IDF-HMN-21052270625/2021

hCoV-19/France/IDF-HMN-21052270626/2021  
hCoV-19/France/IDF-HMN-21052270627/2021  
hCoV-19/France/IDF-HMN-21052270629/2021  
hCoV-19/France/IDF-HMN-21052270630/2021  
hCoV-19/France/IDF-HMN-21052270631/2021  
hCoV-19/France/IDF-HMN-21052270638/2021  
hCoV-19/France/IDF-HMN-21052270646/2021  
hCoV-19/France/IDF-HMN-21052270647/2021  
hCoV-19/France/IDF-HMN-21052270649/2021  
hCoV-19/France/IDF-HMN-21052270652/2021  
hCoV-19/France/IDF-HMN-21052270654/2021  
hCoV-19/France/IDF-HMN-21052270657/2021  
hCoV-19/France/IDF-HMN-21052270675/2021  
hCoV-19/France/IDF-HMN-21052270676/2021  
hCoV-19/France/IDF-HMN-21052270678/2021  
hCoV-19/France/IDF-HMN-21052270679/2021  
hCoV-19/France/IDF-HMN-21052270680/2021  
hCoV-19/France/IDF-HMN-21052270684/2021  
hCoV-19/France/IDF-HMN-21052270686/2021  
hCoV-19/France/IDF-HMN-21052270688/2021  
hCoV-19/France/IDF-HMN-21052270694/2021  
hCoV-19/France/IDF-HMN-21052270699/2021  
hCoV-19/France/IDF-HMN-21052270701/2021  
hCoV-19/France/IDF-HMN-21052270707/2021  
hCoV-19/France/IDF-HMN-21052270712/2021  
hCoV-19/France/IDF-HMN-21052270714/2021  
hCoV-19/France/IDF-HMN-21052270716/2021  
hCoV-19/France/IDF-HMN-21052270719/2021  
hCoV-19/France/IDF-HMN-21052270734/2021  
hCoV-19/France/IDF-HMN-21052270737/2021  
hCoV-19/France/IDF-HMN-21052270739/2021  
hCoV-19/France/IDF-HMN-21052280096/2021  
hCoV-19/France/IDF-HMN-21052280105/2021  
hCoV-19/France/IDF-HMN-21052280121/2021  
hCoV-19/France/IDF-HMN-21052280123/2021  
hCoV-19/France/IDF-HMN-21052280126/2021  
hCoV-19/France/IDF-HMN-21052280127/2021  
hCoV-19/France/IDF-HMN-21052280129/2021  
hCoV-19/France/IDF-HMN-21052280130/2021  
hCoV-19/France/IDF-HMN-21052280131/2021  
hCoV-19/France/IDF-HMN-21052280133/2021  
hCoV-19/France/IDF-HMN-21052280134/2021  
hCoV-19/France/IDF-HMN-21052280135/2021  
hCoV-19/France/IDF-HMN-21052280136/2021  
hCoV-19/France/IDF-HMN-21052280138/2021  
hCoV-19/France/IDF-HMN-21052280139/2021

hCoV-19/France/IDF-HMN-21052280140/2021  
hCoV-19/France/IDF-HMN-21052280141/2021  
hCoV-19/France/IDF-HMN-21052280143/2021  
hCoV-19/France/IDF-HMN-21052280145/2021  
hCoV-19/France/IDF-HMN-21052280147/2021  
hCoV-19/France/IDF-HMN-21052280148/2021  
hCoV-19/France/IDF-HMN-21052280150/2021  
hCoV-19/France/IDF-HMN-21052280153/2021  
hCoV-19/France/IDF-HMN-21052280155/2021  
hCoV-19/France/IDF-HMN-21052280157/2021  
hCoV-19/France/IDF-HMN-21052280158/2021  
hCoV-19/France/IDF-HMN-21052280164/2021  
hCoV-19/France/IDF-HMN-21052280165/2021  
hCoV-19/France/IDF-HMN-21052280173/2021  
hCoV-19/France/IDF-HMN-21052280177/2021  
hCoV-19/France/IDF-HMN-21052280178/2021  
hCoV-19/France/IDF-HMN-21052280197/2021  
hCoV-19/France/IDF-HMN-21052280199/2021  
hCoV-19/France/IDF-HMN-21052280203/2021  
hCoV-19/France/IDF-HMN-21052280222/2021  
hCoV-19/France/IDF-HMN-21052280223/2021  
hCoV-19/France/IDF-HMN-21052280224/2021  
hCoV-19/France/IDF-HMN-21052280225/2021  
hCoV-19/France/IDF-HMN-21052280226/2021  
hCoV-19/France/IDF-HMN-21052280227/2021  
hCoV-19/France/IDF-HMN-21052280229/2021  
hCoV-19/France/IDF-HMN-21052280230/2021  
hCoV-19/France/IDF-HMN-21052280241/2021  
hCoV-19/France/IDF-HMN-21052280242/2021  
hCoV-19/France/IDF-HMN-21052280244/2021  
hCoV-19/France/IDF-HMN-21052280245/2021  
hCoV-19/France/IDF-HMN-21052280246/2021  
hCoV-19/France/IDF-HMN-21052280247/2021  
hCoV-19/France/IDF-HMN-21052280248/2021  
hCoV-19/France/IDF-HMN-21052280249/2021  
hCoV-19/France/IDF-HMN-21052280251/2021  
hCoV-19/France/IDF-HMN-21052280253/2021  
hCoV-19/France/IDF-HMN-21052280255/2021  
hCoV-19/France/IDF-HMN-21052280256/2021  
hCoV-19/France/IDF-HMN-21052280259/2021  
hCoV-19/France/IDF-HMN-21052280260/2021  
hCoV-19/France/IDF-HMN-21052280261/2021  
hCoV-19/France/IDF-HMN-21052280262/2021  
hCoV-19/France/IDF-HMN-21052280263/2021  
hCoV-19/France/IDF-HMN-21052280285/2021  
hCoV-19/France/IDF-HMN-21052280302/2021

hCoV-19/France/IDF-HMN-21052280304/2021  
hCoV-19/France/IDF-HMN-21052280305/2021  
hCoV-19/France/IDF-HMN-21052280306/2021  
hCoV-19/France/IDF-HMN-21052280322/2021  
hCoV-19/France/IDF-HMN-21052280323/2021  
hCoV-19/France/IDF-HMN-21052280324/2021  
hCoV-19/France/IDF-HMN-21052280524/2021  
hCoV-19/France/IDF-HMN-21052310450/2021  
hCoV-19/France/IDF-HMN-21052310451/2021  
hCoV-19/France/IDF-HMN-21052310452/2021  
hCoV-19/France/IDF-HMN-21052310454/2021  
hCoV-19/France/IDF-HMN-21052310459/2021  
hCoV-19/France/IDF-HMN-21052310460/2021  
hCoV-19/France/IDF-HMN-21052310461/2021  
hCoV-19/France/IDF-HMN-21052310462/2021  
hCoV-19/France/IDF-HMN-21052310463/2021  
hCoV-19/France/IDF-HMN-21052310466/2021  
hCoV-19/France/IDF-HMN-21052310467/2021  
hCoV-19/France/IDF-HMN-21052310468/2021  
hCoV-19/France/IDF-HMN-21052310470/2021  
hCoV-19/France/IDF-HMN-21052310475/2021  
hCoV-19/France/IDF-HMN-21052310477/2021  
hCoV-19/France/IDF-HMN-21052310479/2021  
hCoV-19/France/IDF-HMN-21062030211/2021  
hCoV-19/France/IDF-HMN-21062030259/2021  
hCoV-19/France/IDF-HMN-21062030263/2021  
hCoV-19/France/IDF-HMN-21062030271/2021  
hCoV-19/France/IDF-HMN-21062030274/2021  
hCoV-19/France/IDF-HMN-21062030275/2021  
hCoV-19/France/IDF-HMN-21062030277/2021  
hCoV-19/France/IDF-HMN-21062030278/2021  
hCoV-19/France/IDF-HMN-21062030296/2021  
hCoV-19/France/IDF-HMN-21062030304/2021  
hCoV-19/France/IDF-HMN-21062030316/2021  
hCoV-19/France/IDF-HMN-21062030317/2021  
hCoV-19/France/IDF-HMN-21062030319/2021  
hCoV-19/France/IDF-HMN-21062030328/2021  
hCoV-19/France/IDF-HMN-21062030358/2021  
hCoV-19/France/IDF-HMN-21062030359/2021  
hCoV-19/France/IDF-HMN-21062030486/2021  
hCoV-19/France/IDF-HMN-21062030488/2021  
hCoV-19/France/IDF-HMN-21062030492/2021  
hCoV-19/France/IDF-HMN-21062030494/2021  
hCoV-19/France/IDF-HMN-21062030496/2021  
hCoV-19/France/IDF-HMN-21062030497/2021  
hCoV-19/France/IDF-HMN-21062030500/2021



hCoV-19/France/IDF-HMN-21062040156/2021  
hCoV-19/France/IDF-HMN-21062040157/2021  
hCoV-19/France/IDF-HMN-21062040161/2021  
hCoV-19/France/IDF-HMN-21062040164/2021  
hCoV-19/France/IDF-HMN-21062040165/2021  
hCoV-19/France/IDF-HMN-21062040172/2021  
hCoV-19/France/IDF-HMN-21062040179/2021  
hCoV-19/France/IDF-HMN-21062040203/2021  
hCoV-19/France/IDF-HMN-21062040206/2021  
hCoV-19/France/IDF-HMN-21062040207/2021  
hCoV-19/France/IDF-HMN-21062040208/2021  
hCoV-19/France/IDF-HMN-21062040209/2021  
hCoV-19/France/IDF-HMN-21062040210/2021  
hCoV-19/France/IDF-HMN-21062040216/2021  
hCoV-19/France/IDF-HMN-21062040218/2021  
hCoV-19/France/IDF-HMN-21062040248/2021  
hCoV-19/France/IDF-HMN-21062040249/2021  
hCoV-19/France/IDF-HMN-21062040255/2021  
hCoV-19/France/IDF-HMN-21062040256/2021  
hCoV-19/France/IDF-HMN-21062040258/2021  
hCoV-19/France/IDF-HMN-21062040267/2021  
hCoV-19/France/IDF-HMN-21062040273/2021  
hCoV-19/France/IDF-HMN-21062040278/2021  
hCoV-19/France/IDF-HMN-21062040281/2021  
hCoV-19/France/IDF-HMN-21062040286/2021  
hCoV-19/France/IDF-HMN-21062040289/2021  
hCoV-19/France/IDF-HMN-21062080280/2021  
hCoV-19/France/IDF-HMN-21062080282/2021  
hCoV-19/France/IDF-HMN-21062080283/2021  
hCoV-19/France/IDF-HMN-21062080284/2021  
hCoV-19/France/IDF-HMN-21062080356/2021  
hCoV-19/France/IDF-HMN-21062080367/2021  
hCoV-19/France/IDF-HMN-21062080369/2021  
hCoV-19/France/IDF-HMN-21062080372/2021  
hCoV-19/France/IDF-HMN-21062080376/2021  
hCoV-19/France/IDF-HMN-21062080378/2021  
hCoV-19/France/IDF-HMN-21062080383/2021  
hCoV-19/France/IDF-HMN-21062080384/2021  
hCoV-19/France/IDF-HMN-21062080387/2021  
hCoV-19/France/IDF-HMN-21062080389/2021  
hCoV-19/France/IDF-HMN-21062080392/2021  
hCoV-19/France/IDF-HMN-21062080397/2021  
hCoV-19/France/IDF-HMN-21062090072/2021  
hCoV-19/France/IDF-HMN-21062090290/2021  
hCoV-19/France/IDF-HMN-21062090292/2021  
hCoV-19/France/IDF-HMN-21062090293/2021

hCoV-19/France/IDF-HMN-21062090295/2021  
hCoV-19/France/IDF-HMN-21062090297/2021  
hCoV-19/France/IDF-HMN-21062090300/2021  
hCoV-19/France/IDF-HMN-21062090301/2021  
hCoV-19/France/IDF-HMN-21062090303/2021  
hCoV-19/France/IDF-HMN-21062090304/2021  
hCoV-19/France/IDF-HMN-21062090305/2021  
hCoV-19/France/IDF-HMN-21062090306/2021  
hCoV-19/France/IDF-HMN-21062090307/2021  
hCoV-19/France/IDF-HMN-21062090308/2021  
hCoV-19/France/IDF-HMN-21062090309/2021  
hCoV-19/France/IDF-HMN-21062090310/2021  
hCoV-19/France/IDF-HMN-21062090311/2021  
hCoV-19/France/IDF-HMN-21062090312/2021  
hCoV-19/France/IDF-HMN-21062090313/2021  
hCoV-19/France/IDF-HMN-21062090314/2021  
hCoV-19/France/IDF-HMN-21062090315/2021  
hCoV-19/France/IDF-HMN-21062090316/2021  
hCoV-19/France/IDF-HMN-21062090317/2021  
hCoV-19/France/IDF-HMN-21062090318/2021  
hCoV-19/France/IDF-HMN-21062090319/2021  
hCoV-19/France/IDF-HMN-21062090516/2021

|                | 2020 |     |     |     |     |     |     |     |     |     |     |     |     |    | 2021 |    |    |    |    |    |    |    |     |     |     |     |     |     |     |     |     |     |     |     |  |
|----------------|------|-----|-----|-----|-----|-----|-----|-----|-----|-----|-----|-----|-----|----|------|----|----|----|----|----|----|----|-----|-----|-----|-----|-----|-----|-----|-----|-----|-----|-----|-----|--|
|                | S40  | S41 | S42 | S43 | S44 | S45 | S46 | S47 | S49 | S50 | S51 | S52 | S53 | S1 | S2   | S3 | S4 | S5 | S6 | S7 | S8 | S9 | S10 | S11 | S12 | S13 | S14 | S15 | S16 | S17 | S18 | S19 | S20 | S21 |  |
| α<br>(B.1.1.7) |      |     |     |     |     |     |     |     |     |     |     | 1   |     |    | 2    | 5  | 6  | 14 | 16 | 11 | 22 | 23 | 24  | 29  | 13  | 5   | 4   | 6   | 4   | 1   | 2   | 3   | 3   | 1   |  |
| β<br>(B.1.351) |      |     |     |     |     |     |     |     |     |     |     |     |     |    |      |    |    | 2  | 3  |    | 3  | 3  | 3   |     | 1   |     | 2   |     | 1   |     |     | 1   |     |     |  |
| γ (P.1)        |      |     |     |     |     |     |     |     |     |     |     |     |     |    |      |    |    | 1  |    | 1  |    |    |     | 1   |     |     |     |     |     |     |     |     |     |     |  |
| B.1.474        |      |     |     | 1   |     |     |     |     |     |     |     |     |     |    |      |    |    | 1  |    |    |    |    |     |     |     |     |     |     |     |     |     |     |     |     |  |
| B.1.525        |      |     |     |     |     |     |     |     |     |     |     |     |     |    |      |    |    |    |    |    |    |    | 1   |     |     | 1   | 1   |     |     |     |     |     |     |     |  |
| C.16           |      |     |     |     |     |     |     |     |     |     |     |     |     |    |      |    |    |    | 1  |    |    | 1  |     |     |     | 1   | 1   |     |     |     |     |     |     |     |  |
| C.35           |      |     |     |     |     |     |     |     |     |     |     |     |     |    |      |    |    |    |    |    |    | 1  |     |     |     |     |     |     |     |     |     |     |     |     |  |
| C.36           |      |     |     |     |     |     |     |     |     |     |     |     |     |    |      |    |    |    | 1  |    |    |    |     |     | 1   |     |     |     |     |     |     |     |     |     |  |
| A21            |      |     |     |     |     |     |     |     |     |     |     |     |     |    |      |    |    | 3  |    | 1  | 1  |    |     |     |     |     |     |     |     |     |     |     |     |     |  |
| A27            |      |     |     |     |     |     |     |     |     |     |     |     |     |    |      |    |    |    | 1  |    | 1  |    |     | 1   |     |     |     |     |     |     |     |     |     |     |  |
| B.1.1          |      |     |     | 1   |     |     |     |     |     |     |     |     |     |    |      |    |    |    |    |    |    |    |     |     |     |     |     |     |     |     |     |     |     |     |  |
| B.1.222        |      |     |     |     |     |     |     |     |     |     |     |     |     |    |      |    |    |    |    |    |    | 1  |     |     |     |     |     |     |     |     |     |     |     |     |  |
| B.1.1.241      |      |     | 1   | 1   | 2   |     | 1   |     |     | 1   |     |     | 1   |    |      | 1  |    |    |    |    |    |    |     |     |     |     |     |     |     |     |     |     |     |     |  |
| B.1.1.269      |      |     |     |     |     |     |     |     | 1   |     |     |     |     |    |      |    |    |    |    |    |    |    |     |     |     |     |     |     |     |     |     |     |     |     |  |
| B.1.317        |      |     | 1   |     |     |     |     |     |     |     |     |     |     |    | 1    |    |    |    |    |    |    |    |     |     |     |     |     |     |     |     |     |     |     |     |  |
| B.1.1.420      |      |     |     |     |     |     |     |     |     |     |     |     |     |    |      |    |    |    |    | 1  |    |    |     |     |     |     |     |     |     |     |     |     |     |     |  |
| B.1.1.50       |      | 1   |     |     |     |     |     |     |     |     |     |     |     |    |      |    |    |    |    |    |    |    |     |     |     |     |     |     |     |     |     |     |     |     |  |
| B.1.1.519      |      |     |     |     |     |     |     |     |     |     |     |     |     |    |      |    | 1  |    |    |    |    |    |     |     |     |     |     |     |     |     |     |     |     |     |  |
| B.1.2          |      |     |     |     |     |     | 1   | 1   |     |     |     | 1   |     |    | 1    |    |    |    |    |    |    |    |     |     |     |     |     |     |     |     |     |     |     |     |  |
| B.1.210        |      |     |     |     |     |     |     |     |     |     |     | 1   |     |    |      |    |    |    |    |    |    |    |     |     |     |     |     |     |     |     |     |     |     |     |  |
| B.1.214        |      |     |     |     |     |     |     |     |     |     |     |     |     |    |      |    |    |    |    | 1  | 1  |    | 1   |     |     |     |     |     |     |     |     |     |     |     |  |
| B.1.221        |      |     |     | 1   |     |     |     |     |     |     |     |     |     |    |      | 1  |    |    |    |    |    |    |     |     |     |     |     |     |     |     |     |     |     |     |  |
| B.1.258        |      |     |     |     |     | 1   |     |     |     |     |     |     |     |    |      |    |    |    |    |    |    |    |     |     |     |     |     |     |     |     |     |     |     |     |  |
| B.1.36         |      |     |     |     | 1   |     |     |     |     |     |     |     |     |    |      |    |    |    |    |    |    |    |     |     |     |     |     |     |     |     |     |     |     |     |  |
| B.1.416.1      | 1    |     |     |     |     |     |     |     |     |     |     |     |     |    |      |    |    |    |    |    |    |    |     |     |     |     |     |     |     |     |     |     |     |     |  |
| B.1.177        |      |     | 4   | 2   | 3   | 6   | 3   | 2   | 1   | 1   | 1   |     | 5   | 1  | 4    |    | 1  |    |    | 1  | 1  |    | 1   |     |     |     |     |     |     |     |     |     |     |     |  |
| B.1            | 1    | 1   | 2   | 1   | 1   | 2   | 1   |     | 3   |     |     | 1   |     |    |      |    | 1  |    |    | 1  |    |    |     |     |     |     |     |     |     |     |     |     |     |     |  |
| B.1.160        | 3    | 6   | 4   | 5   | 15  | 6   | 4   | 7   | 1   | 5   | 4   | 5   | 3   |    |      | 5  | 4  | 6  | 8  |    | 2  |    | 1   |     |     |     |     |     |     |     |     |     |     |     |  |

**Supplementary Table S1:** Time course of emerging SARS-CoV-2 variants during the study period. Number of samples corresponding to each variant are shown in each week of the study period.

**Supplementary Figure S1.** Phylogenetic tree performed after full-length genome alignment. The phylogenetic tree shows that the mutation Orf3a-Q57H is mainly harbored by variants from lineages B.1.160 and B.1.351.

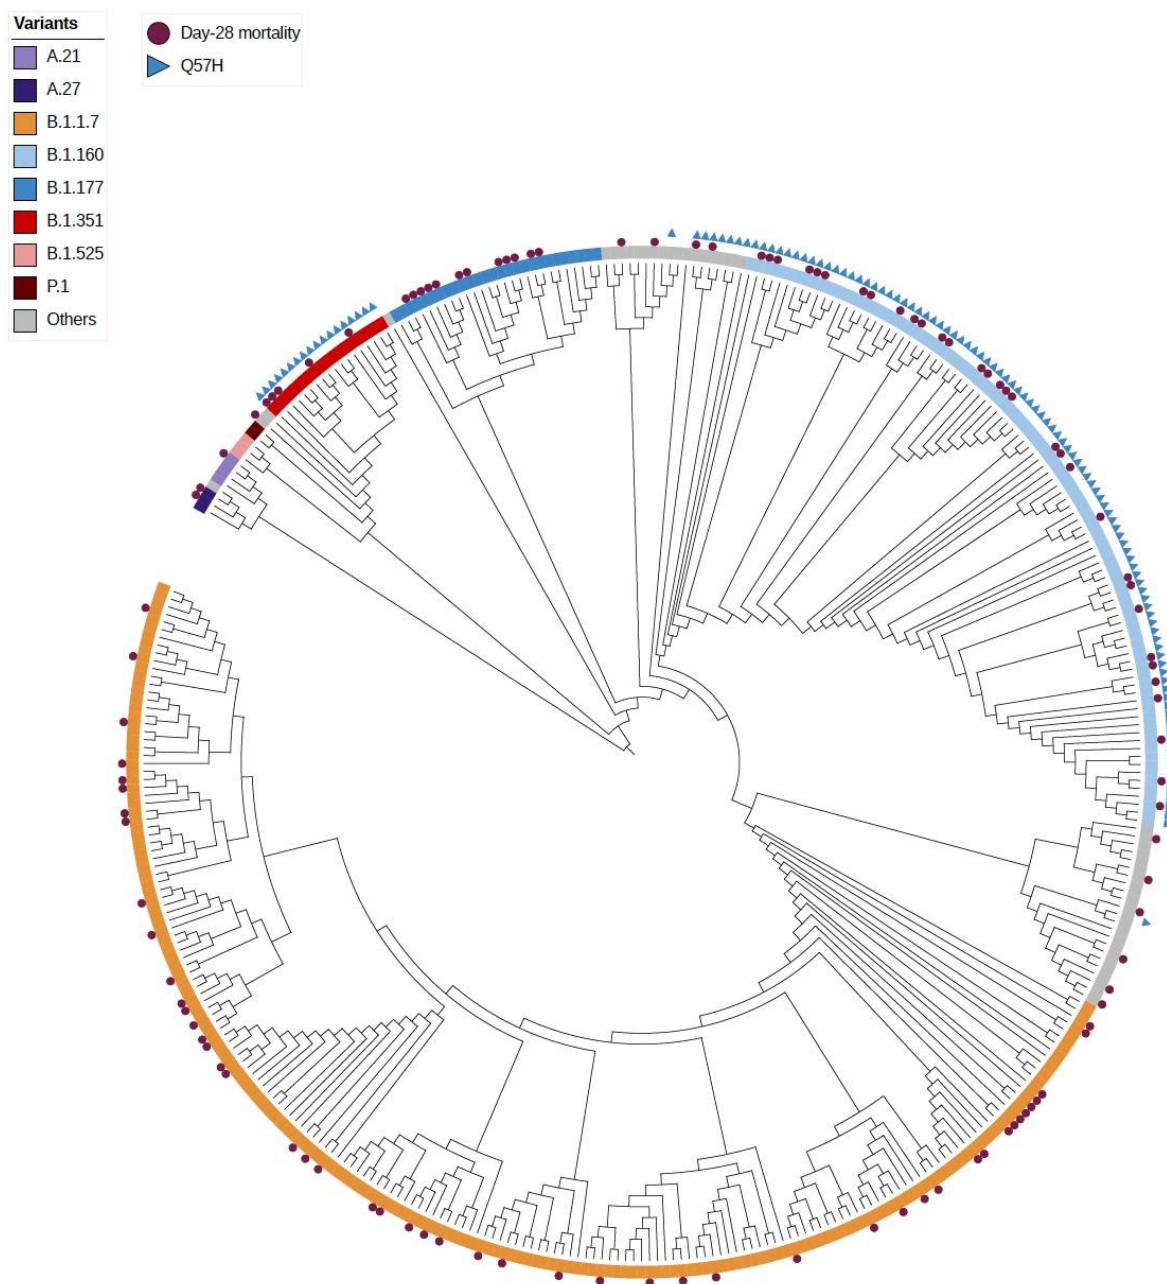

Supplement: s1 [file s1]
